# Supplementary material
Source: Royal Society of Chemistry journal article supplement (doi:10.1039/d6ay00424e)
Supplement: d6ay00424e1.pdf [file d6ay00424e1.pdf]

## Supplementary information

**Table S1.** Oligonucleotide sequences used in this work.

| Title            | Sequences (5' to 3')                                                                         |
|------------------|----------------------------------------------------------------------------------------------|
| SP               | GGA TCA AAA ACA TCT TTA CAC TrA GTC TTT TTT TTT<br>GA TCC GAG CCG GAC GAA GTG ACA GTG TT     |
| Tracker          | CAC TTC TTT TAG TGT AAA GAT GTT AGC TTT TTG ATC<br>CTT GGG GA AAG GC TAG CTACA ACGAA GAAGT G |
| Substrate<br>“1” | Cy5A CTT CT rAr UT TCC CCT TTT TTT TTT TTT<br>GGA TCA AAA ACA TCT TTA CAC T                  |
| Target miRNA     | UAA CAC UGU CUG GUA AAG AUG G                                                                |
| miRNA-a          | UAA CAUGU CUG GUA AAG AUG G                                                                  |
| miRNA-b          | UAA CAUUA CUG GUA AAG AUG G                                                                  |
| miRNA-c          | UAA CAUUA UG GUA AAG AUG G                                                                   |

### Supplemented experimental section:

#### *qRT-PCR Protocol*

Quantitative reverse transcription PCR (qRT-PCR) was performed using the miRcute Plus miRNA qPCR Kit (TIANGEN Biotech, Beijing, China) according to the manufacturer's instructions. Briefly, total RNA was extracted from serum samples using the miRcute Serum/Plasma miRNA Isolation Kit (TIANGEN). Reverse transcription was carried out with 2  $\mu$ L of RNA sample in a 20  $\mu$ L reaction mixture containing miRcute Plus miRNA RT Primer and miRcute Plus Enzyme Mix, incubated at 42 °C for 60 min, followed by 95 °C for 3 min. Real-time PCR was performed on a LightCycler 480 II System (Roche) using 2  $\mu$ L of cDNA product in a 20  $\mu$ L reaction with miRcute Plus miRNA Premix. The thermal cycling protocol was: 95 °C for 15 min, followed by 40 cycles of 94 °C for 20 s and 60 °C for 34 s. U6 snRNA was used as the endogenous control for normalization. Each sample was analyzed in triplicate.

#### *Preparation of the DNA walker@plate*

The DNA walker@plate was prepared by sequential immobilization of the biotinylated tracker strand and the substrate strand onto a streptavidin-coated 96-well plate (Corning, USA). First, 100  $\mu$ L of the biotinylated tracker strand (100 nM in PBS buffer, pH 7.4) was added to each well and incubated at 37 °C for 2 h to allow immobilization via streptavidin–biotin interaction. The wells were then washed three times with 200  $\mu$ L of washing buffer (10 mM Tris-HCl, pH 7.4, 150 mM NaCl, 0.05% Tween 20) to remove unbound probes. Subsequently, 100  $\mu$ L of the substrate strand (1  $\mu$ M in PBS buffer) was introduced into each well and incubated at 37 °C for 1 h. The molar ratio of tracker to substrate was 1:10, as optimized in the main text (Fig. 3B). After immobilization, the wells were washed three times with washing buffer to remove nonspecifically adsorbed substrates. The successful assembly of the DNA walker@plate was verified by fluorescence measurements using a FAM-labeled substrate and a Cy5-labeled tracker. The prepared DNA walker@plate was used

immediately for subsequent detection experiments.

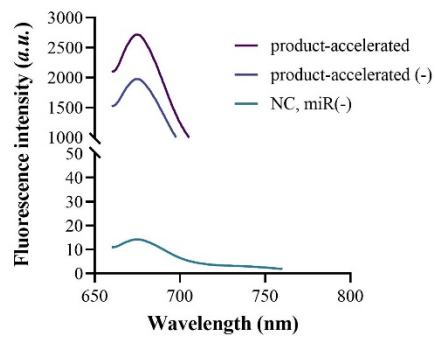

**Figure S1.** Fluorescence spectrum of the method for target miRNA detection when using substrate with or without product accelerate capability.
